# Supplementary material for: Determining the Authenticity of Spirulina Dietary Supplements Based on Stable Isotope and Elemental Composition
Source: MDPI journal article supplement (doi:10.3390/foods12030562), 2023-01-27
Supplement: s1 [file s1]

**Table S1.** Elemental composition of *Spirulina* dietary supplements from the Slovenian market.

| S.<br>No. <sup>1</sup> | Si<br>(g/kg) | P<br>(g/kg) | S<br>(g/kg) | Cl<br>(g/kg) | K<br>(g/kg) | Ca<br>(g/kg) | Ti<br>(mg/kg) | Mn<br>(mg/kg) | Fe<br>(g/kg) | Zn<br>(mg/kg) | Br<br>(mg/kg) | Rb<br>(mg/kg) | Sr (mg/kg) |
|------------------------|--------------|-------------|-------------|--------------|-------------|--------------|---------------|---------------|--------------|---------------|---------------|---------------|------------|
| S1                     | 1.57         | 10.5        | 7.53        | 0.66         | 16.1        | 8.18         | 18.2          | 43.4          | 0.81         | 14.0          | 1.29          | 1.55          | 37.9       |
| S2                     | 7.69         | 11.4        | 7.53        | 3.07         | 14.8        | 1.32         | 56.9          | 159           | 3.29         | 43.6          | 11.2          | 7.47          | 10.0       |
| S3                     | 1.16         | 10.6        | 8.64        | 3.18         | 15.4        | 0.82         | 5.45          | 29.4          | 0.49         | 8.33          | 1.91          | 1.67          | 17.8       |
| S4                     | 13.5         | 10.0        | 7.57        | 5.77         | 17.1        | 2.20         | 46.5          | 128           | 3.48         | 52.7          | 16.5          | 11.9          | 24.3       |
| S5                     | 1.34         | 12.4        | 9.04        | 3.78         | 20.8        | 0.74         | 8.77          | 22.1          | 0.48         | 14.6          | 1.77          | 1.23          | 25.1       |
| S6                     | 21.7         | 12.7        | 6.47        | 0.09         | 11.0        | 1.28         | 9.31          | 54.9          | 0.90         | 13.9          | 0.50          | 4.12          | 10.2       |
| S7                     | 10.7         | 11.8        | 7.77        | 0.60         | 14.3        | 5.10         | 3.96          | 32.8          | 0.37         | 10.4          | 0.47          | 0.81          | 22.1       |
| S8                     | 16.0         | 11.5        | 7.53        | 1.03         | 14.7        | 2.04         | 60.6          | 35.0          | 1.39         | 16.0          | 0.91          | 0.91          | 27.3       |
| S9                     | 5.21         | 5.06        | 3.14        | 2.61         | 19.7        | 2.83         | 10.4          | 43.0          | 0.44         | 19.1          | 10.8          | 3.75          | 12.7       |
| S10                    | 2.34         | 14.1        | 9.38        | 2.11         | 18.5        | 3.09         | 35.5          | 36.6          | 1.68         | 18.5          | 1.34          | 1.58          | 34.7       |
| S11                    | 1.42         | 12.9        | 8.29        | 0.48         | 15.2        | 1.20         | 4.42          | 26.5          | 0.57         | 11.1          | 1.19          | 1.07          | 28.2       |
| S12                    | 1.63         | 13.9        | 8.42        | 1.77         | 16.8        | 5.24         | 12.3          | 38.2          | 1.38         | 33.0          | 1.39          | 1.48          | 31.8       |
| S13                    | 16.6         | 12.6        | 7.79        | 1.97         | 15.5        | 5.39         | 14.8          | 34.4          | 1.79         | 33.6          | 1.47          | 0.92          | 31.1       |
| S14                    | 7.94         | 12.2        | 7.54        | 0.19         | 13.6        | 1.00         | 9.91          | 34.9          | 0.69         | 16.5          | 0.57          | 2.23          | 7.41       |
| S15                    | 1.43         | 11.9        | 7.32        | 0.21         | 13.7        | 0.89         | 5.07          | 33.3          | 0.66         | 15.7          | 0.48          | 1.60          | 6.82       |
| S16                    | 1.59         | 14.7        | 7.50        | 0.52         | 14.3        | 2.78         | 6.08          | 36.3          | 0.65         | 17.5          | 0.91          | 0.50          | 12.7       |
| S17                    | 1.61         | 13.5        | 8.64        | 2.21         | 16.6        | 5.34         | 12.3          | 30.9          | 1.74         | 34.9          | 1.88          | 1.20          | 32.3       |
| S18                    | 2.74         | 12.6        | 6.17        | 0.60         | 8.63        | 63.5         | 43.1          | 47.1          | 0.75         | 11.1          | 9.11          | 2.55          | 478        |
| S19                    | 19.4         | 12.2        | 9.29        | 2.55         | 18.4        | 28.0         | 15.9          | 30.3          | 0.56         | 9.74          | 2.26          | 1.24          | 27.6       |
| S20                    | 16.8         | 12.1        | 8.39        | 3.04         | 16.3        | 2.43         | 47.5          | 29.1          | 1.13         | 23.0          | 2.00          | 1.91          | 32.2       |
| S21                    | 14.7         | 9.77        | 7.30        | 1.94         | 16.2        | 1.35         | 28.2          | 150           | 0.69         | 22.4          | 3.09          | 2.97          | 9.66       |
| S22                    | 1.85         | 6.82        | 3.60        | 0.55         | 7.40        | 1.37         | 11.1          | 21.1          | 0.39         | 7.69          | 1.24          | 1.06          | 8.00       |
| S23                    | 15.1         | 11.2        | 7.12        | 1.12         | 14.2        | 2.03         | 65.8          | 28.3          | 1.39         | 14.0          | 0.88          | 0.78          | 28.0       |
| S24                    | 1.40         | 9.27        | 6.05        | 0.87         | 12.5        | 2.45         | 19.0          | 88.3          | 0.77         | 15.4          | 1.04          | 1.16          | 11.2       |
| S25                    | 15.4         | 9.61        | 8.32        | 2.68         | 17.3        | 1.02         | 9.37          | 51.5          | 0.60         | 10.0          | 1.60          | 1.43          | 18.7       |
| S26                    | 15.0         | 10.9        | 7.91        | 5.63         | 17.5        | 2.28         | 42.3          | 185           | 3.09         | 35.5          | 17.4          | 9.96          | 14.1       |
| S27                    | 1.79         | 11.2        | 8.30        | 2.07         | 16.8        | 0.80         | 8.61          | 22.8          | 0.72         | 15.6          | 1.27          | 1.04          | 22.3       |
| S28                    | 4.91         | 10.3        | 8.66        | 3.47         | 17.4        | 0.72         | 2.58          | 26.2          | 0.47         | 7.27          | 2.54          | 2.44          | 15.4       |
| S29                    | 15.6         | 10.9        | 7.24        | 1.67         | 15.6        | 1.62         | 35.7          | 192           | 1.14         | 20.9          | 2.71          | 2.06          | 15.6       |
| S30                    | 15.1         | 10.1        | 6.99        | 1.63         | 15.2        | 1.50         | 34.5          | 195           | 1.12         | 21.7          | 3.21          | 1.33          | 15.2       |
| S31                    | 1.53         | 11.4        | 6.72        | 1.36         | 14.7        | 1.67         | 13.0          | 178           | 0.78         | 22.0          | 1.82          | 2.85          | 7.85       |
| S32                    | 16.1         | 10.2        | 8.15        | 2.62         | 14.2        | 2.54         | 39.4          | 35.9          | 1.39         | 22.9          | 1.86          | 2.30          | 35.5       |
| S33                    | 1.06         | 10.2        | 7.99        | 2.18         | 14.9        | 1.00         | 5.84          | 28.0          | 0.64         | 5.42          | 1.62          | 1.55          | 29.7       |
| S34                    | 16.9         | 10.9        | 8.09        | 4.34         | 15.9        | 0.91         | 7.82          | 27.8          | 0.52         | 11.3          | 4.47          | 0.57          | 31.2       |
| S35                    | 7.52         | 10.1        | 7.85        | 2.20         | 14.4        | 0.96         | 6.85          | 26.5          | 0.63         | 7.18          | 2.38          | 1.27          | 26.3       |
| S36                    | 1.97         | 11.4        | 7.10        | 2.58         | 14.9        | 2.17         | 24.7          | 34.5          | 1.01         | 17.0          | 6.74          | 1.23          | 55.0       |
| S37                    | 6.43         | 6.16        | 3.88        | 0.91         | 5.83        | 0.75         | 12.8          | 19.3          | 0.28         | 6.02          | 1.67          | 0.55          | 9.75       |
| S38                    | 7.56         | 10.3        | 8.04        | 0.30         | 9.00        | 4.93         | 2.81          | 24.9          | 0.41         | 13.3          | 0.67          | 1.33          | 26.1       |
| S39                    | 12.1         | 9.93        | 6.71        | 1.76         | 12.7        | 0.97         | 8.88          | 14.7          | 0.44         | 13.1          | 1.86          | 0.99          | 19.8       |
| S40                    | 8.49         | 10.2        | 8.06        | 0.34         | 8.84        | 5.52         | 4.39          | 28.3          | 0.42         | 14.7          | 0.85          | 1.09          | 29.3       |
| S41                    | 0.94         | 8.64        | 7.18        | 5.03         | 16.4        | 0.52         | 3.58          | 18.6          | 0.38         | 10.3          | 2.93          | 2.42          | 15.9       |
| S42                    | 1.07         | 10.1        | 7.72        | 4.70         | 15.1        | 0.69         | 8.89          | 29.1          | 0.55         | 9.91          | 3.78          | 1.21          | 23.7       |
| S43                    | 1.34         | 10.1        | 9.91        | 5.34         | 15.7        | 1.42         | 3.16          | 23.2          | 0.41         | 2.30          | 5.51          | 1.34          | 71.8       |
| S44                    | 0.78         | 8.56        | 6.63        | 2.75         | 20.6        | 3.45         | 10.4          | 84.9          | 0.69         | 24.9          | 8.00          | 6.55          | 86.2       |
| S45                    | 1.02         | 11.0        | 7.87        | 1.13         | 14.3        | 1.26         | 3.18          | 27.4          | 0.45         | 18.1          | 1.43          | 1.47          | 22.0       |
| S46                    | 0.68         | 6.64        | 7.38        | 5.36         | 26.9        | 0.46         | 5.36          | 32.9          | 0.93         | 7.59          | 7.07          | 4.21          | 4.39       |

<sup>1</sup> Sample number.

**Table S2.** Composition of Zarrouk's medium [1].

| Constituents                                                                                                                                                                                                                                       | Content (g/L) |
|----------------------------------------------------------------------------------------------------------------------------------------------------------------------------------------------------------------------------------------------------|---------------|
| K <sub>2</sub> HPO <sub>4</sub>                                                                                                                                                                                                                    | 0.5           |
| NaNO <sub>3</sub>                                                                                                                                                                                                                                  | 2.5           |
| K <sub>2</sub> SO <sub>4</sub>                                                                                                                                                                                                                     | 1.0           |
| NaCl                                                                                                                                                                                                                                               | 1.0           |
| MgSO <sub>4</sub> · 7H <sub>2</sub> O                                                                                                                                                                                                              | 0.2           |
| CaCl <sub>2</sub> · 2H <sub>2</sub> O                                                                                                                                                                                                              | 0.04          |
| FeSO <sub>4</sub> · 7H <sub>2</sub> O                                                                                                                                                                                                              | 0.01          |
| EDTA                                                                                                                                                                                                                                               | 0.08          |
| NaHCO <sub>3</sub>                                                                                                                                                                                                                                 | 16.8          |
|                                                                                                                                                                                                                                                    | Content (mL)  |
| Micronutrient solution                                                                                                                                                                                                                             |               |
| (H <sub>3</sub> BO <sub>3</sub> (2.86 g/L), MnCl <sub>2</sub> · 4H <sub>2</sub> O (1.81 g/L), ZnSO <sub>4</sub> · 4H <sub>2</sub> O (0.222 g/L), Na <sub>2</sub> MoO <sub>4</sub> (0.0177 g/L), CuSO <sub>4</sub> · 5H <sub>2</sub> O (0.079 g/L)) | 1.0           |

**Reference:**

1. Michael, A.; Kyewalyanga, M.S.; Mtolera, M.S.; Lugomela, C.V. Antioxidants Activity of the Cyanobacterium, *Arthrospira (Spirulina) Fusiformis* Cultivated in a Low-Cost Medium. *Afr. J. Food Sci.* **2018**, *12*, 188–195, doi:10.5897/AJFS2018.1688.

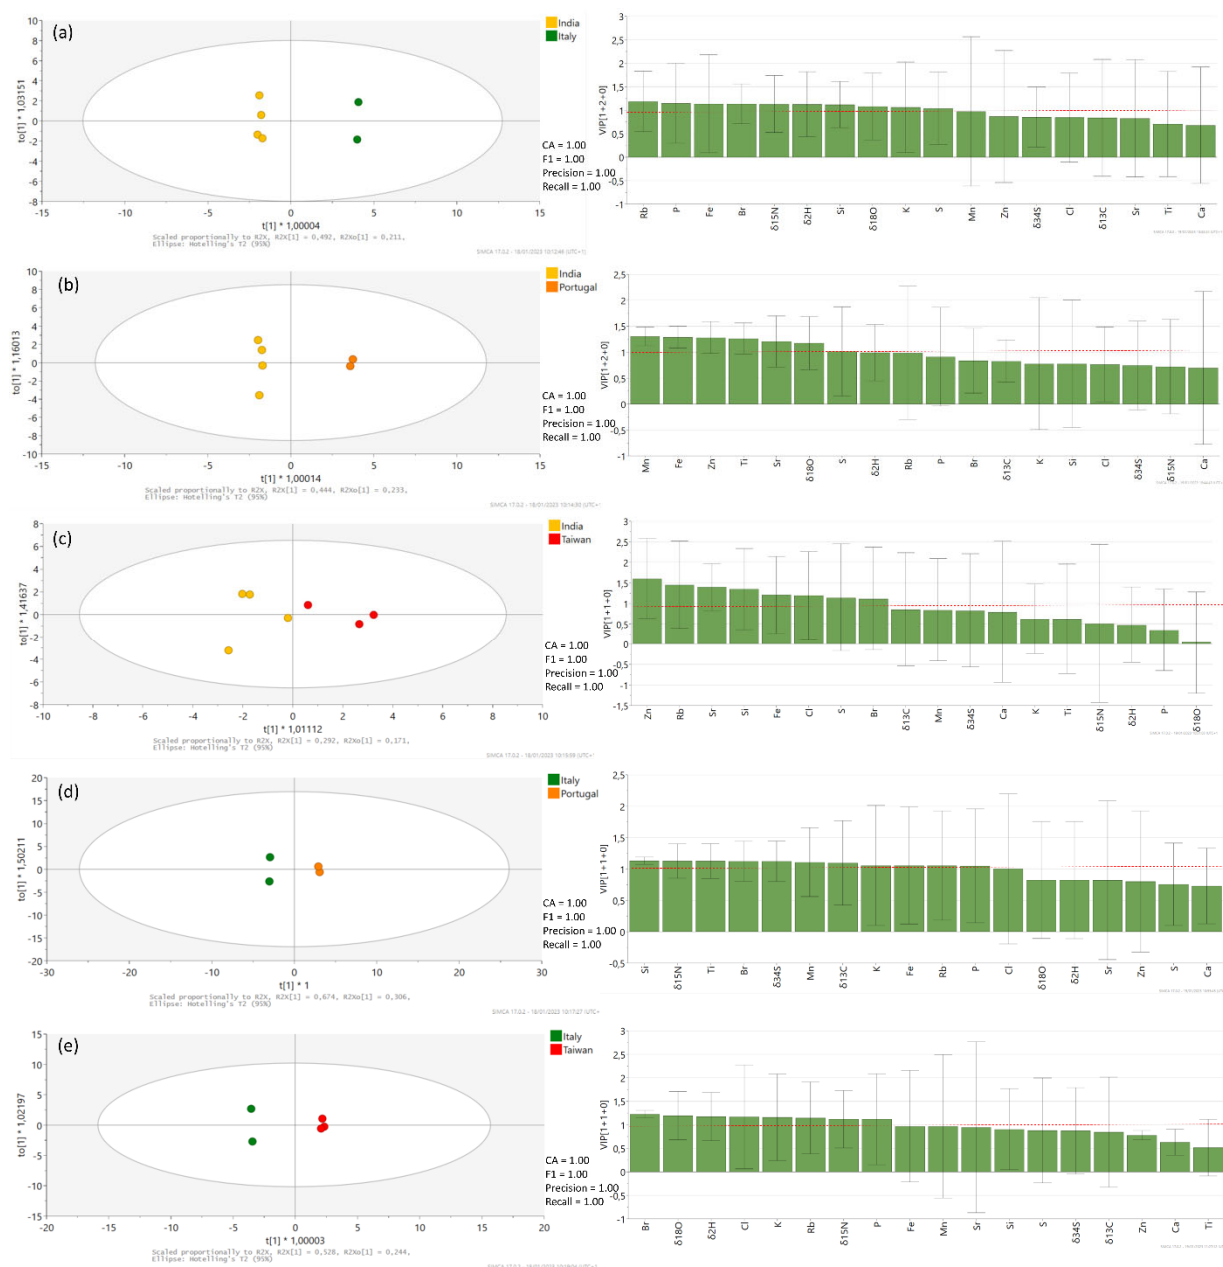

**Figure S1:** Pairwise comparisons between different declared countries of origin of *Spirulina* products: OPLS-DA score plots and VIP values, derived from all isotopic and elemental composition data. The ellipse on the score plot represents the 95% confidence interval. Red dotted line indicates a criteria for identification of the variables, important for the developed model. Separation of India from Italy (a), Portugal (b), Taiwan (c) and separation of Italy from Portugal (d) and Taiwan (e).

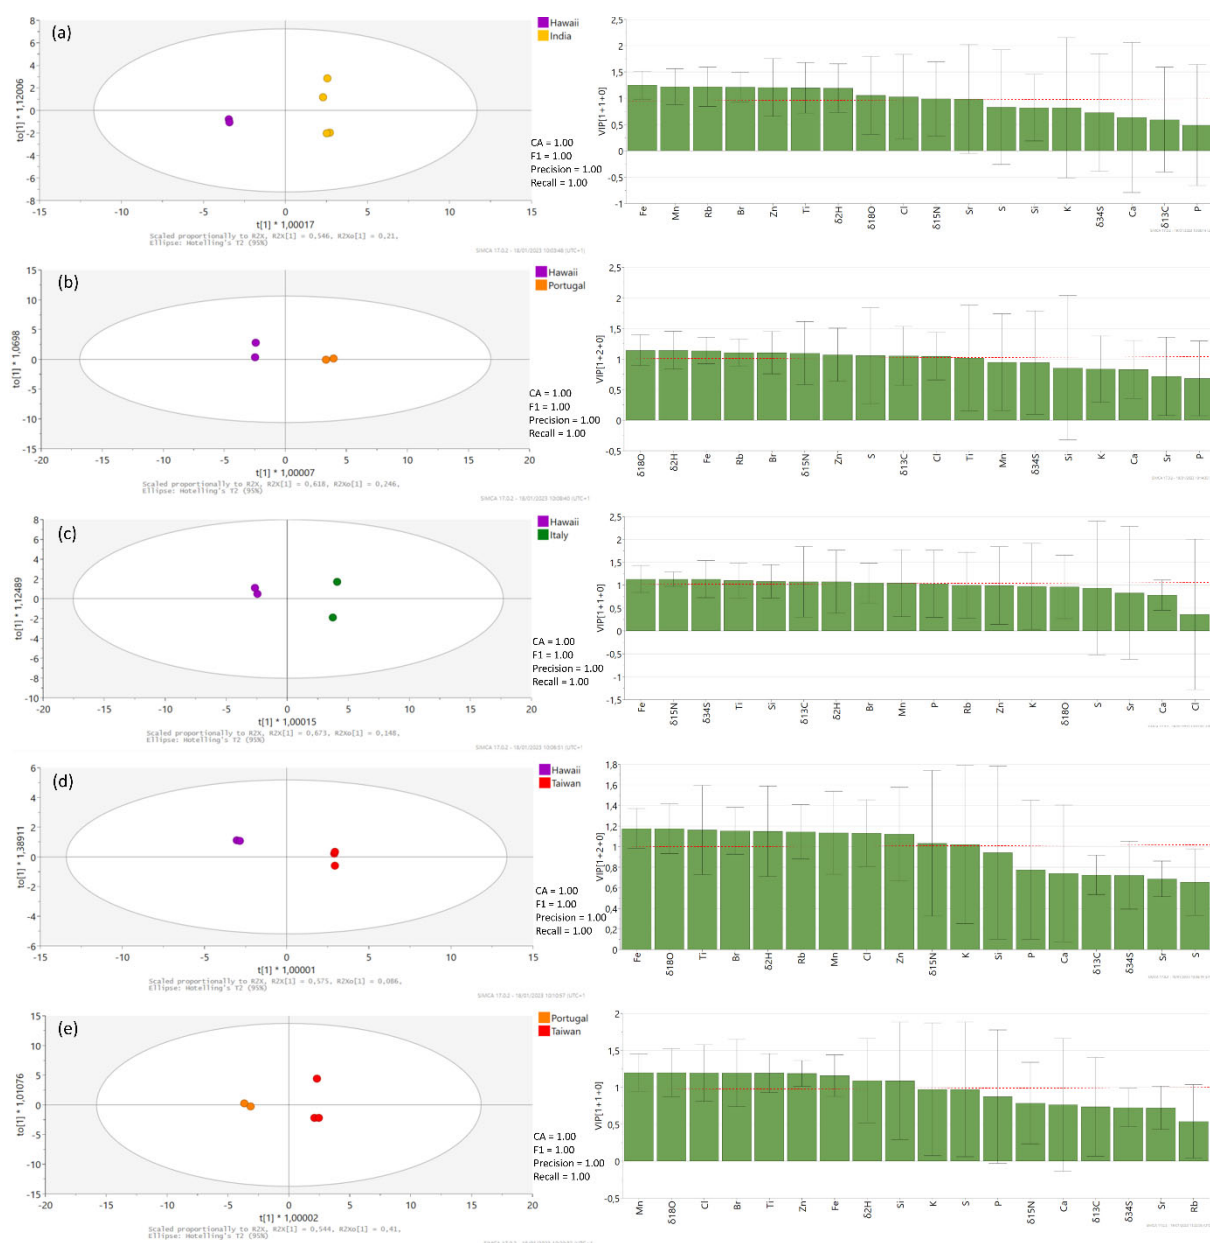

**Figure S2:** Pairwise comparisons between different declared countries of origin of *Spirulina* products: OPLS-DA score plots and VIP values, derived from all isotopic and elemental composition data. The ellipse on the score plot represents the 95% confidence interval. Red dotted line indicates a criteria for identification of the variables, important for the developed model. Separation of Hawaii from India (a), Portugal (b), Italy (c), Taiwan (d) and separation of Portugal and Taiwan (e).
